# Supplementary material for: MiR-1246 Promotes Metastasis and Invasion of A549 cells by Targeting GSK-3β‒Mediated Wnt/β-Catenin Pathway
Source: PubMed Central journal article supplement — Cancer Res Treat. 2019 Mar 4;51(4):1420–9. doi: 10.4143/crt.2018.638 (PMC6790833; doi:10.4143/crt.2018.638), 2019-03-04
Supplement: crt-2018-638-suppl1.pdf [file crt-2018-638-suppl1.pdf]

## Supplementary Material 1

### 1. Material

#### Reagents and consumables

| Materials                                               | Company                               | Cat. #       |
|---------------------------------------------------------|---------------------------------------|--------------|
| TRIZOL LS reagent                                       | Invitrogen                            | 10296-010    |
| Nuclease-free water                                     | Promega                               | P1193        |
| Chloroform                                              | Beijing Chemical Works                |              |
| Isopropyl alcohol                                       | Beijing Chemical Works                |              |
| Ethanol                                                 | Beijing Chemical Works                |              |
| <i>Escherichia coli</i> polyA polymerase                | NEB                                   | M0276S       |
| M-MLV Reverse Transcriptase                             | Promega                               | M1705        |
| Recombinant RNasin ribonuclease inhibitor               | Promega                               | N2511        |
| dNTP mix                                                | SIGMA                                 | D7295        |
| 1.5 mL EP tubes                                         | Axygen                                | MCT-150-C    |
| 0.2 mL EP tubes                                         | Axygen                                | PCR-02-L-C   |
| 1 mL Rnase free tip                                     | Axygen                                | T-1000-B-R-S |
| 200 $\mu$ L Rnase free tip                              | Axygen                                | T-200-B-R-S  |
| 10 $\mu$ L Rnase free tip                               | Axygen                                | T-300-B-R-S  |
| MicroRNA primer system                                  | MystiCq microRNA<br>qPCR assay primer |              |
| Solutions                                               |                                       |              |
| 1. PBS 500 mL                                           |                                       |              |
| 1) KCl                                                  | 0.1 g                                 |              |
| 2) KH <sub>2</sub> PO <sub>4</sub>                      | 0.1 g                                 |              |
| 3) NaCl                                                 | 4.0 g                                 |              |
| 4) Na <sub>2</sub> HPO <sub>4</sub> .12H <sub>2</sub> O | 1.4425 g                              |              |

1. Dissolve the above components in ddH<sub>2</sub>O and adjust to pH 7.4 with 0.1 N NaOH. Add ddH<sub>2</sub>O to final volume of 500 mL. Autoclaved and stored at 4 °C.
2. 75% ethanol (v/v)  
75% ethanol (v/v) should be prepared freshly by mix ethanol with nuclease-free water.

## 2. Methods

### 1) RNA isolation by TRIZOL LS reagent

#### Homogenizing samples

Add 0.75 mL of TRIZOL LS Reagent per 0.25 mL serum sample and 1  $\mu$ L (20 nM) synthesized internal control 1 miRNA per serum sample.

Homogenize by pipetting or alternative vortexing.

#### Phase separation

Incubate the homogenized samples for 5 minutes at room temperature.

Add 0.2 mL of chloroform per 0.75 mL of TRIZOL LS reagent. Cap sample tubes securely.

Shake tubes vigorously by hand for 15 seconds and incubate them at room temperature for 5 to 10 minutes. Centrifuge the samples at no more than 12,000  $\times$ g for 15 minutes at 2°C to 8°C.

Sample will separate in 3 layers- Phase separation.

- a. Top layer clear aqueous phase = RNA
- b. Middle layer white cloudy phase = DNA
- c. Bottom layer red phenol phase = protein

Carefully transfer the aqueous phase to a clean 1.5 mL nuclease-free EP tube.

#### RNA precipitation

Add as much isopropanol as the amount of aqueous phase.

Homogenize the aqueous solution by vortexing or flicking.

Incubate samples at -20°C for more than 30minutes and centrifuge at no more than 12,000  $\times$ g for 15-30 minutes at 2°C to 8°C.

#### RNA wash and resuspension

Remove the supernatant.

Wash the RNA pellet once with 75% ethanol, adding at least 1ml of 75% ethanol per 0.75 mL of TRIZOL LS reagent used for the initial homogenization.

Mix the sample by vortexing and centrifuge at no more than 7,500  $\times$ g for 5 minutes at 2°C to 8°C.

Briefly dry the RNA pellet.

Dissolve RNA in 15  $\mu$ L RNase-free water by passing the solution a few times through a pipette tip.

Determine the quality and quantity of microRNA on Nanadrop 8000.

### 2) First strand cDNA synthesise

#### A-Plus

Please use A-Plus bacterial polyA polymerase to add polyA tail for pre- and mature form of miRNAs.

For 20  $\mu$ L reaction, add:

|                    |                 |
|--------------------|-----------------|
| RNA                | 10 pg-1 $\mu$ g |
| 10 $\times$ Buffer | 2 $\mu$ L       |

|                  |             |
|------------------|-------------|
| dATP (10 mM)     | 2 $\mu$ L   |
| PolyA polymerase | 0.5 $\mu$ L |
| RNase inhibitor  | 0.5 $\mu$ L |
| RNase-free water |             |

---

Total 20  $\mu$ L

Incubate at 37°C for 1 hr

### **RT-PCR**

Take the reaction tube out of PCR machine and add 1  $\mu$ L of 0.5  $\mu$ g/ $\mu$ L RT primer, incubate at 70°C for 5 minutes, then place on ice immediately and keep it for at least 2 minutes (The major purpose of this step is to disrupt the secondary structure of RNA and primer).

In a 20  $\mu$ L reaction, add:

|                     |             |
|---------------------|-------------|
| 5 $\times$ Buffer   | 4 $\mu$ L   |
| dNTP(10mM)          | 1 $\mu$ L   |
| M-MLV               | 0.5 $\mu$ L |
| RNase inhibitor     | 0.5 $\mu$ L |
| A-Plus reaction mix | 10 $\mu$ L  |
| RNase-free water    | 4 $\mu$ L   |

---

Total 20  $\mu$ L

Incubate at 42°C for 1 hr

### **3. qPCR**

In a 25  $\mu$ L reaction, add:

|                                          |             |
|------------------------------------------|-------------|
| cDNA                                     | 1 $\mu$ L   |
| 10 $\times$ UPM                          | 2 $\mu$ L   |
| 10 $\times$ Gene specific primer (10 uM) | 2 $\mu$ L   |
| 2 $\times$ qPCR Mix                      | 10 $\mu$ L  |
| ROX                                      | 0.4 $\mu$ L |
| ddH <sub>2</sub> O                       | 4.6 $\mu$ L |

---

Total 20  $\mu$ L

QPCR system

Instrument: ABI viia@7

Set up:

|             |                      |
|-------------|----------------------|
| 95°C 5 min  |                      |
| 95°C 30 sec | } 40 cycles          |
| 60°C 1 min  |                      |
| 95°C 15 sec | } Dissociation stage |
| 60°C 1 min  |                      |
| 95°C 15 sec |                      |
